# Supplementary material
Source: PubMed Central journal article supplement (PMC3336047)
Supplement: NIHMS356316-supplement-02.pdf [file NIHMS356316-supplement-02.pdf]

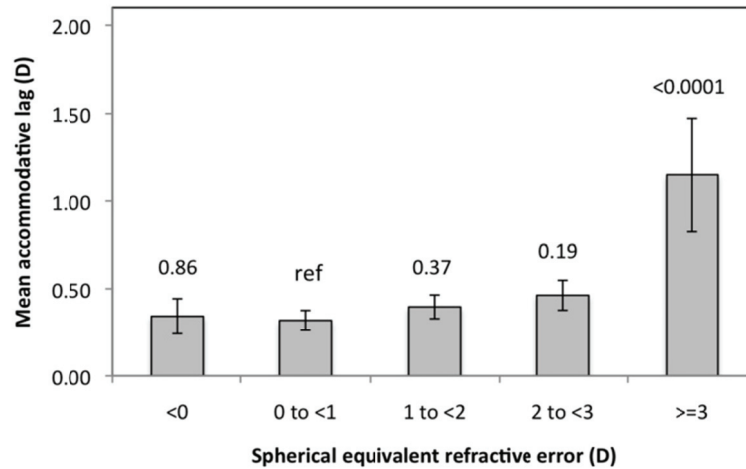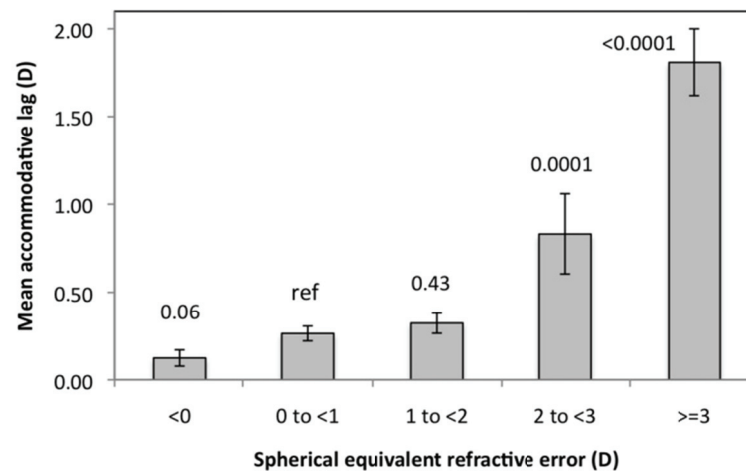

**e-Supplement 2.** Accommodative lag as a function of diopters of spherical equivalent refractive error, stratified by age. A, Children 5 to 11 months of age. B, Children 12 to 24 months of age. *P* values for comparison to the reference group having 0 to 1 D of hyperopia are shown above each bar. Error bars represent the SEM. *Ref*, reference group.
