# Supplementary material
Source: PubMed Central journal article supplement (PMC3336047)
Supplement: NIHMS356316-supplement-03.pdf [file NIHMS356316-supplement-03.pdf]

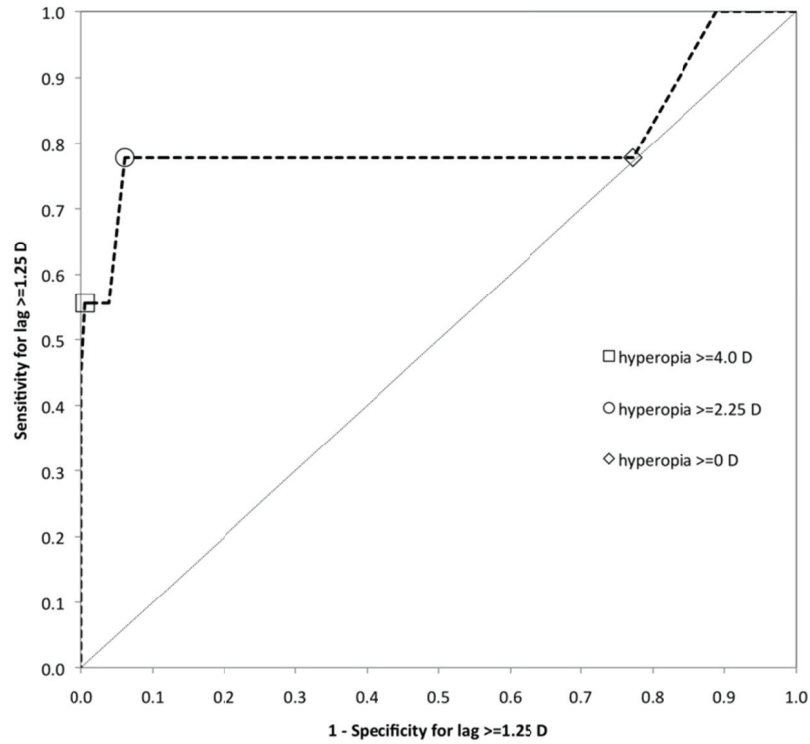

**e-Supplement 3.** ROC curve for detecting lag of accommodation  $\geq 1.25$  D, when varying a threshold level of spherical equivalent hyperopia by 0.25 D steps. Points on the curve corresponding to threshold levels of hyperopia of 0 D, 2.25 D, and 4.0 D are indicated.
