# Supplementary material
Source: PubMed Central journal article supplement (PMC3336047)
Supplement: NIHMS356316-supplement-04.pdf [file NIHMS356316-supplement-04.pdf]

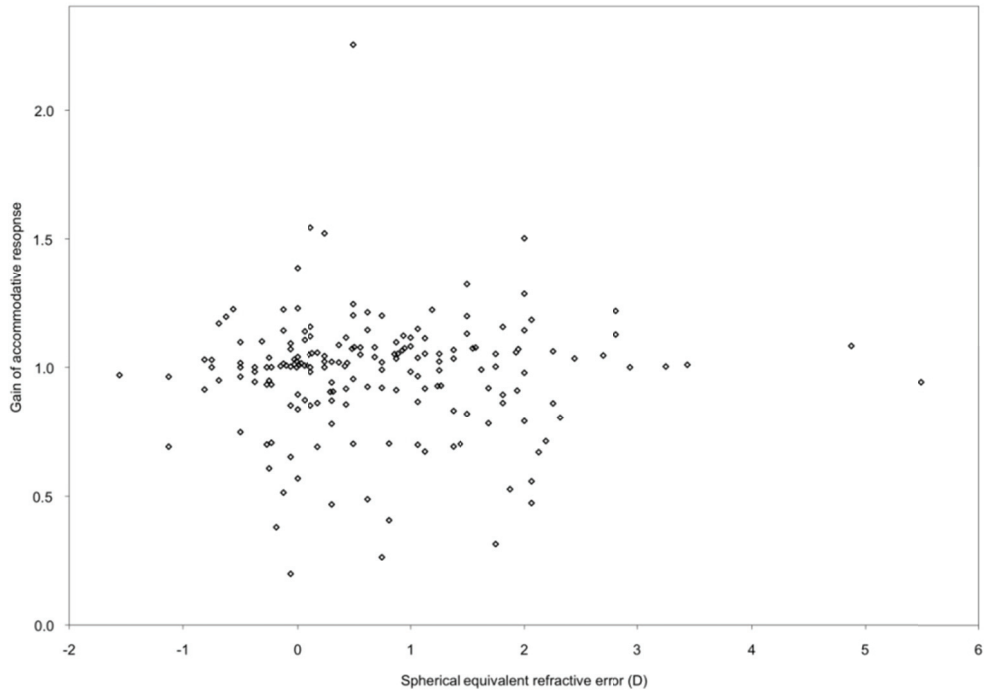

**e-Supplement 4.** Gain of the accommodative response (slope of the accommodative demand–response function) as a function of spherical equivalent refractive error. A gain of 0.5 signifies that for 1.0 D increase in accommodative demand, the child shows 0.5 D increase in accommodative output. Superimposed data points are displaced along the x-axis for clarity.
